# Supplementary material
Source: HighWire-hosted journal article supplement (https://www.ajnr.org/highwire/filestream/52321/field_highwire_adjunct_files/0/2983_tables.pdf)
Supplement: 2983_tables.pdf [file 2983_tables.pdf]

**On-line Table 1: DTI metrics obtained with the overlay method and volume measures**

|          | Caudate       |                   | Thalamus        |                   |
|----------|---------------|-------------------|-----------------|-------------------|
|          | MD            | FA                | MD              | FA                |
| Controls | 0.871 ± 0.101 | 0.197 ± 0.010     | 0.766 ± 0.052   | 0.295 ± 0.010     |
| RR       | 0.906 ± 0.075 | 0.244 ± 0.027***  | 0.766 ± 0.040   | 0.322 ± 0.010***  |
| SP       | 0.913 ± 0.104 | 0.270 ± 0.031***† | 0.841 ± 0.139*‡ | 0.338 ± 0.021***# |

**Note:**—Values are reported as mean ± standard deviation. Patients vs controls: \**P* < .05; \*\**P* < .01; \*\*\**P* < .001; RR vs SP: †*P* < .05; ‡*P* < .01, #*P* < .001.

**On-line Table 2: Correlation coefficients between DTI metrics obtained with the overlay method, other MRI metrics, and clinical scores in all patients with MS**

|          | Age     | DD      | EDSS     | MSFC    | T2-LL    | Volume   |
|----------|---------|---------|----------|---------|----------|----------|
| T2-LL    | 0.230   | 0.413** | 0.250    | -0.243  | -        | -        |
| Caudate  |         |         |          |         |          |          |
| MD       | -0.027  | -0.030  | -0.149   | 0.023   | 0.194    | -0.274   |
| FA       | 0.167   | 0.349*  | 0.176    | -0.330  | 0.237    | -0.439** |
| Volume   | -0.373* | -0.315* | -0.223   | 0.366*  | -0.481** | -        |
| Thalamus |         |         |          |         |          |          |
| MD       | 0.129   | 0.215   | 0.278    | -0.188  | 0.480**  | -0.340*  |
| FA       | 0.395*  | 0.242   | 0.387*   | 0.467** | 0.489**  | -0.421** |
| Volume   | -0.019  | -0.202  | -0.399** | 0.078   | -0.369*  | -        |

**Note:**—Significant *P* values: \**P* < .05; \*\**P* < .01
